# Supplementary material
Source: PubMed Central journal article supplement (PMC5819439)
Supplement: pnas.1717910115.sd01.pdf [file pnas.1717910115.sd01.pdf]

Comparative differences and similarities between cytocapsula, cytocapsular tube, and other six organelles.

|                                                               | Cytocapsula                                                                                         | Cytocapsular tube                                                                                                                                                                                       | Pseudopodia protrusion          | Lamellipodia              | Filopodia                 | Bleb                         | Type II Epithelial bridge                                  | Nanotube                                     |
|---------------------------------------------------------------|-----------------------------------------------------------------------------------------------------|---------------------------------------------------------------------------------------------------------------------------------------------------------------------------------------------------------|---------------------------------|---------------------------|---------------------------|------------------------------|------------------------------------------------------------|----------------------------------------------|
| Extension of plasma membrane                                  | -                                                                                                   | -                                                                                                                                                                                                       | +                               | +                         | +                         | +                            | +                                                          | +                                            |
| Enclosed by plasma membrane                                   | -                                                                                                   | -                                                                                                                                                                                                       | +                               | +                         | +                         | +                            | +                                                          | +                                            |
| Extra-plasma membrane                                         | +                                                                                                   | +                                                                                                                                                                                                       | -                               | -                         | -                         | -                            | -                                                          | -                                            |
| Present in 2D or 3D environment                               | 3D                                                                                                  | 3D                                                                                                                                                                                                      | 3D                              | 2D                        | 2D                        | 2D&3D                        | 2D                                                         | 2D&3D                                        |
| Existence without cells                                       | +(up to 48h)                                                                                        | +                                                                                                                                                                                                       | -                               | -                         | -                         | -                            | -                                                          | -                                            |
| Diameter/width                                                | 10-250µm                                                                                            | 5-35µm                                                                                                                                                                                                  | <1µm                            | 0.1-0.2 µm                | 0.1-0.3µm                 | 0.1-0.3µm                    | <0.2µm                                                     | 50-200nm                                     |
| Length                                                        | 15-250µm (major axis)                                                                               | 20-1000µm                                                                                                                                                                                               | 2-10 µm                         | N/A                       | 3-10µm                    | <2µm                         | Up to 570µm                                                | Up to 100µm                                  |
| Topology                                                      | Sphere, oval,                                                                                       | Tube-shaped                                                                                                                                                                                             | Finger-protrusion               | Flat sheet                | Finger-shaped             | Bud-shaped                   | Finger-protrusion                                          | Tiny tube                                    |
| Open/closed ends                                              | Closed                                                                                              | Two closed ends                                                                                                                                                                                         | One closed end                  | One closed end            | One closed end            | One closed end               | One closed end                                             | Two open ends                                |
| Generated by single mammalian cell                            | +                                                                                                   | +                                                                                                                                                                                                       | +                               | +                         | +                         | +                            | +                                                          | -                                            |
| Number per single cell                                        | 1                                                                                                   | 1 (or with branch)                                                                                                                                                                                      | 1 or multiple (1-3 generations) | 1                         | Multiple                  | Multiple                     | Multiple                                                   | Multiple                                     |
| Envelope whole cell (s)                                       | +(≥1 cell)                                                                                          | +(≥1 cell)                                                                                                                                                                                              | -                               | -                         | -                         | -                            | -                                                          | -                                            |
| Separate cell from ECM                                        | +                                                                                                   | +                                                                                                                                                                                                       | -                               | -                         | -                         | -                            | -                                                          | -                                            |
| Permit cell entry                                             | +(≥1 cell)                                                                                          | +(≥1 cell)                                                                                                                                                                                              | -                               | -                         | -                         | -                            | -                                                          | -                                            |
| Permit ecellularization                                       | +                                                                                                   | +                                                                                                                                                                                                       | -                               | -                         | -                         | -                            | -                                                          | -                                            |
| Function(s)                                                   | Supporting scaffolds; cell covering; separate cell from ECM; permit ecellularization nad cell entry | Cell tubular transportation of single cells and multiple cells; promote 3D cell relocation within; cell covering ; separate cell from ECM; permit ecellularization and cell entry; supporting scaffolds | Promote 3D cell migration       | Promote 2D cell migration | Promote 2D cell migration | Promote 2D/3D cell migration | Plasma component transportation; Promote 2D cell migration | cell communication; organelle transportation |
| Enclosed by biomembrane                                       | +                                                                                                   | +                                                                                                                                                                                                       | +                               | +                         | +                         | +                            | +                                                          | +                                            |
| Single cell migration inside                                  | +                                                                                                   | +                                                                                                                                                                                                       | -                               | -                         | -                         | -                            | -                                                          | -                                            |
| Multiple cell migration (streaming) inside                    | -                                                                                                   | +                                                                                                                                                                                                       | -                               | -                         | -                         | -                            | -                                                          | -                                            |
| Life time (with cell, <i>in vitro</i> )/duration of structure | Up to 72h                                                                                           | Up to 98h                                                                                                                                                                                               | Minutes                         | Minutes                   | Minutes                   | < 3 min                      | N/A                                                        | N/A                                          |
| Network formation                                             | -                                                                                                   | +                                                                                                                                                                                                       | -                               | -                         | -                         | -                            | -                                                          | -                                            |
| Cell in the lumen                                             | +                                                                                                   | +                                                                                                                                                                                                       | -                               | -                         | -                         | -                            | -                                                          | -                                            |
| Retraction ability                                            | +                                                                                                   | +                                                                                                                                                                                                       | +                               | +                         | +                         | +                            | +                                                          | N/A                                          |
| Auto membrane degradation not affect cell integrity           | +                                                                                                   | +                                                                                                                                                                                                       | -                               | -                         | -                         | -                            | -                                                          | -                                            |
| Ability to shrink beyond cell                                 | +                                                                                                   | +                                                                                                                                                                                                       | -                               | -                         | -                         | -                            | -                                                          | -                                            |
| Can be enlarged by cell body                                  | +                                                                                                   | +                                                                                                                                                                                                       | -                               | -                         | -                         | -                            | -                                                          | -                                            |
| With nano-protrusions                                         | +                                                                                                   | +                                                                                                                                                                                                       | -                               | -                         | -                         | -                            | -                                                          | -                                            |
